# Supplementary material for: Do pre-diagnosis primary care consultation patterns explain deprivation-specific differences in net survival among women with breast cancer? An examination of individually-linked data from the UK West Midlands cancer registry, national screening programme and Clinical Practice Research Datalink
Source: Springer Nature journal article supplement (doi:10.1186/s12885-017-3129-4), 2017-02-23
Supplement: MOESM1 [file 12089752]

## Additional file 1

### Breast symptoms included in “breast-related consultations”

“Symptom library” for breast-related symptoms supplied by Prof W Hamilton’s Primary Care Diagnostics Group (Exeter University), which consists of codes recorded by the GP during consultations that have been identified as related to breast symptoms (Walker *et al*, 2014).

- Breast lump
- Breast fibroadenoma
- Breast pain
- Breast nodularity
- Nipple bleed
- Nipple retraction
- Nipple discharge
- Paget’s nipple
- Nipple pain
- Breast skin changes
- Breast cyst
- Breast infection
- Breast other
- Axillary lymphadenopathy
- Cervical lymphadenopathy

Other breast-related codes found in text descriptions of other codes

(NOS= not otherwise specified; NAD = no appreciable disease)

- Malignant neoplasm of female breast
- Ca female breast
- Breast examination
- Breast signs and symptoms NOS
- Mammography - X-ray
- Mammography abnormal
- Axillary pain
- Breast signs and symptoms
- Disorders of breast
- Eversion of nipple
- Family History: Breast cancer
- Inflammatory breast diseases NOS
- General breast exam. NAD
- General breast exam. NOS
- Other breast injuries
- Referral to mammography clinic
- Suspected breast cancer
- Axillary lump

**Table S1A: Sample characteristics (N=786) compared to the remaining cohort (N=28,885)**

|                                       | Sample matched to CPRD     |              | Remaining cohort |            | $\chi^2$ <sup>a</sup><br>p value |        |
|---------------------------------------|----------------------------|--------------|------------------|------------|----------------------------------|--------|
|                                       | n                          | %            | N                | %          |                                  |        |
| <b>Total</b>                          | <b>786</b>                 | <b>100.0</b> | <b>28,885</b>    | <b>100</b> |                                  |        |
| <b>Mean age (SD)</b>                  |                            | 59.9 (6.0)   |                  | 59.7 (6.0) |                                  |        |
| <b>Age groups</b>                     |                            |              |                  |            |                                  |        |
|                                       | 50-54                      | 191          | 24.3             | 7,169      | 24.8                             | 0.310  |
|                                       | 55-59                      | 174          | 22.1             | 7,079      | 24.5                             |        |
|                                       | 60-64                      | 216          | 27.5             | 7,264      | 25.1                             |        |
|                                       | 65-70                      | 205          | 26.1             | 7,373      | 25.5                             |        |
| <b>Vital status</b>                   |                            |              |                  |            |                                  |        |
|                                       | Alive                      | 567          | 72.1             | 17,202     | 59.6                             | <0.001 |
|                                       | Dead                       | 219          | 27.9             | 11,683     | 40.4                             |        |
| <b>Extent of disease at diagnosis</b> |                            |              |                  |            |                                  |        |
|                                       | Localised                  | 437          | 55.6             | 15,785     | 54.6                             | 0.940  |
|                                       | Regional                   | 255          | 32.4             | 9,108      | 31.5                             |        |
|                                       | Distant                    | 24           | 3.1              | 924        | 3.2                              |        |
|                                       | Missing                    | 70           | 8.9              | 3,068      | 10.6                             |        |
| <b>Screening groups</b>               |                            |              |                  |            |                                  |        |
|                                       | Screen-detected cancer     | 316          | 40.2             | 10,584     | 36.6                             | 0.041  |
|                                       | Not screen-detected cancer | 470          | 59.8             | 18,301     | 63.4                             |        |
| <b>Deprivation category</b>           |                            |              |                  |            |                                  |        |
|                                       | Least deprived             | 211          | 26.8             | 5,307      | 18.4                             | <0.001 |
|                                       | 2                          | 213          | 27.1             | 6,470      | 22.4                             |        |
|                                       | 3                          | 140          | 17.8             | 5,750      | 19.9                             |        |
|                                       | 4                          | 112          | 14.2             | 5,414      | 18.7                             |        |
|                                       | Most deprived              | 110          | 14.0             | 5,916      | 20.5                             |        |
|                                       | Missing                    | 0            | 0                | 28         | 0.1                              |        |
| <b>Period of diagnosis</b>            |                            |              |                  |            |                                  |        |
|                                       | 1989-1994                  | 81           | 10.3             | 8,173      | 28.3                             | <0.001 |
|                                       | 1995-2000                  | 283          | 36.0             | 9,428      | 32.6                             |        |
|                                       | 2001-2006                  | 422          | 53.7             | 11,284     | 39.1                             |        |

<sup>a</sup>  $\chi^2$  test performed on non-missing data only

**Figure S1A: Comparison of net survival of matched sample to target population cohort overall and by deprivation**

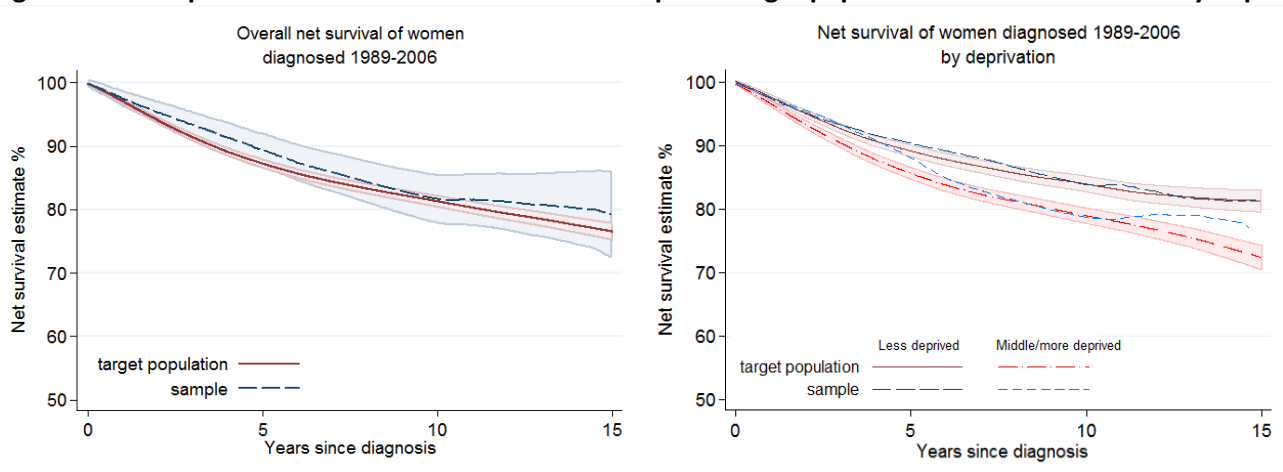

Footnote: Estimates smoothed. CIs shown only for target population for clarity. Sample CIs fully overlap with those of target population.

**Figure S2B: Net survival by deprivation (quintiles 1+2 vs quintiles 3,4+5) and co-variable sub-group**

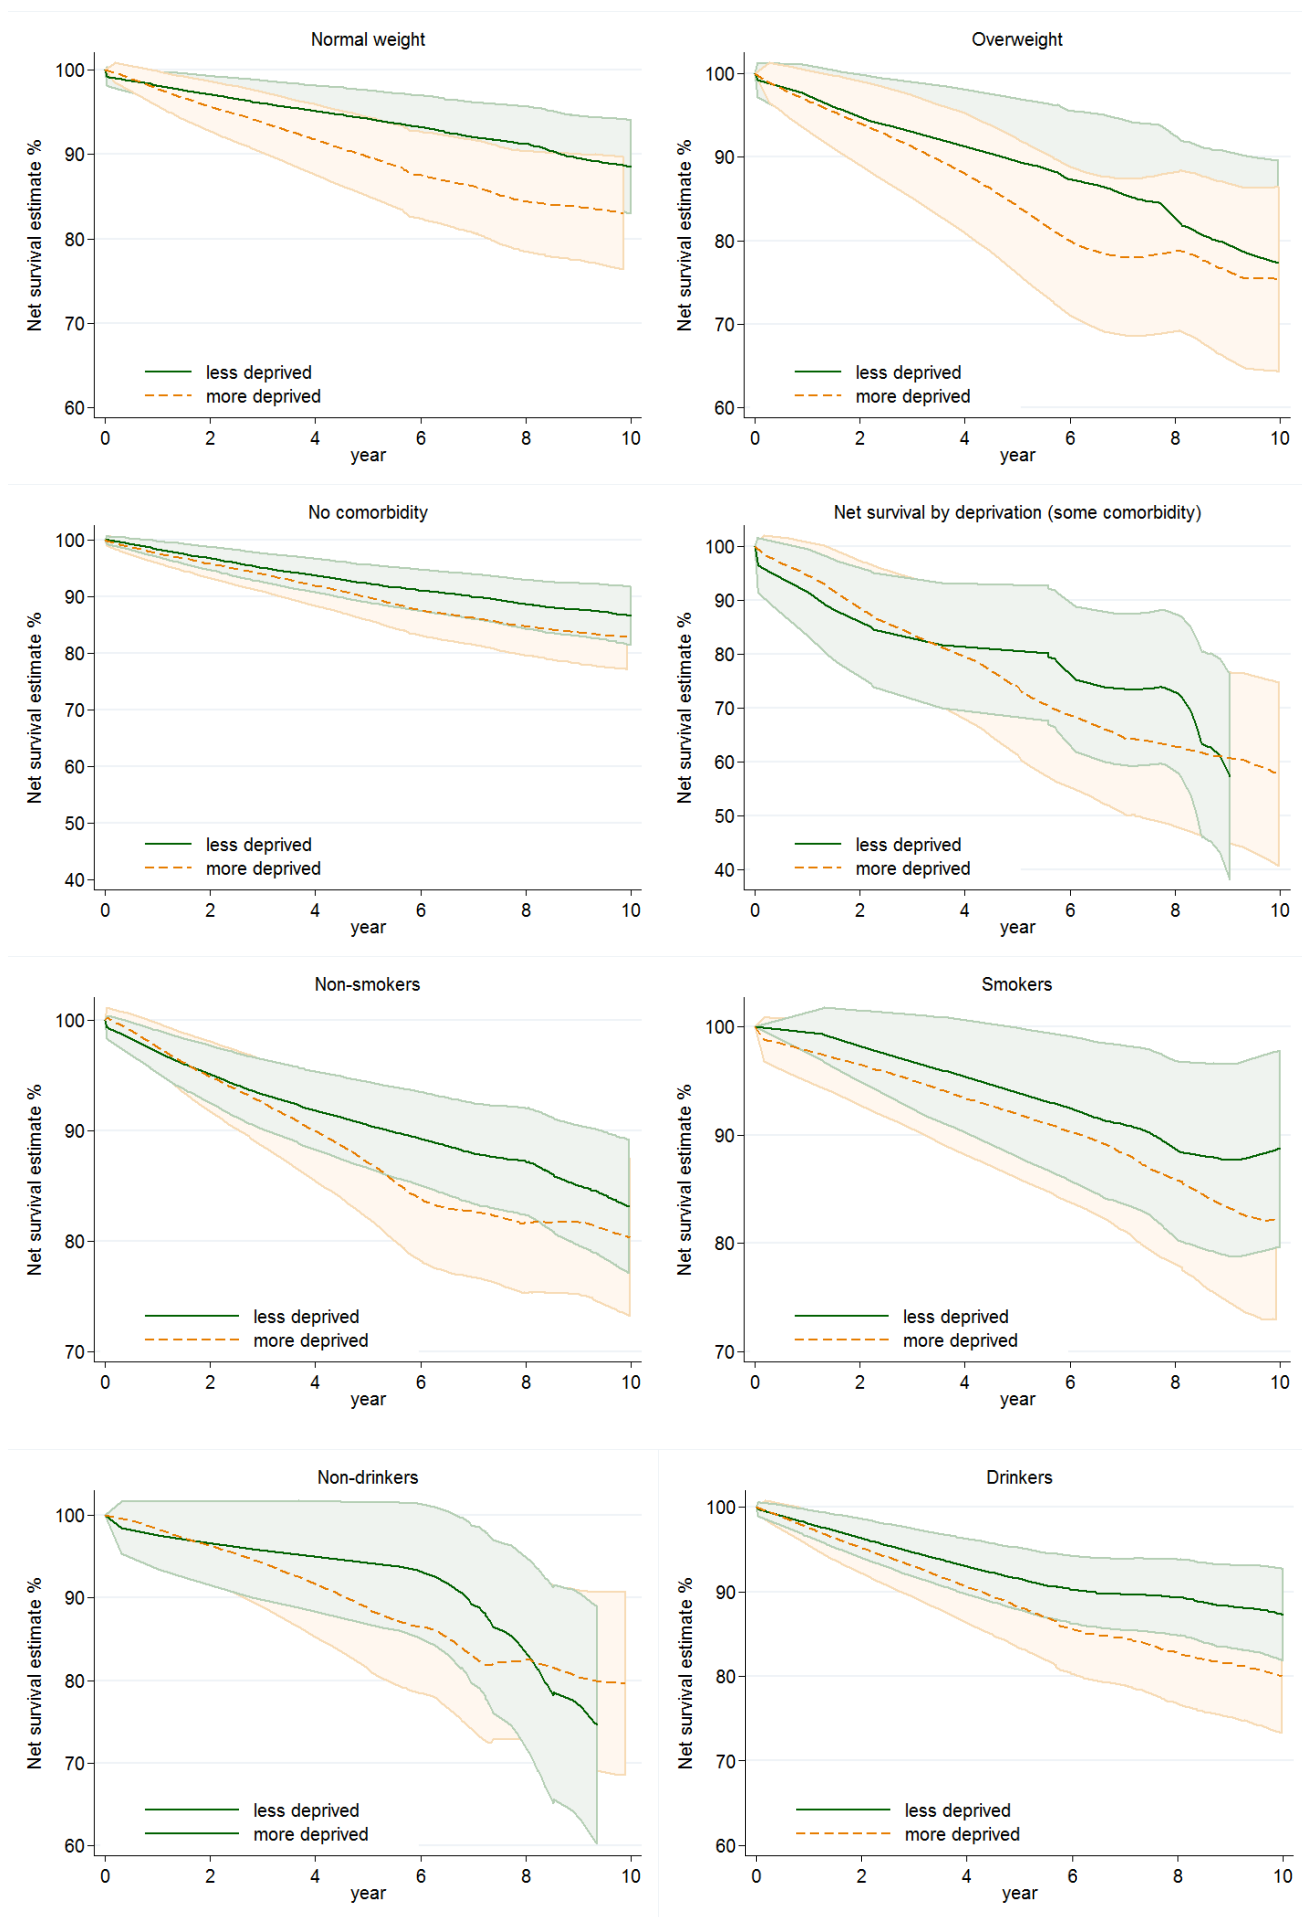

Footnote: Net survival estimated for all women with non-missing data, by co-variable subgroups shown in Table 1. Estimates smoothed.
